# Supplementary material
Source: Elsevier journal article supplement (https://www.sciencedirect.com/science/article/pii/S0212656722000737)
Supplement: mmc1 [file S0212656722000737:mmc1.doc]

**Tabla S1.** Características sociodemográficas de los MAPs participantes en el estudio Delphi de la Iniciativa Óptima.

|  | **Primera ronda**  **N=120** | **Segunda ronda N=118** | ***P*** |
| --- | --- | --- | --- |
| **Edad (años) (Media±D.E.)** | 54,5 ± 8,5 | 54,5 ± 7,8 | 0,998 |
| **Sexo (mujeres), n (%)** | 37 (30,8) | 35 (29,7) | 0,999 |
| **Años de experiencia, n (%)**  **Más de 20 años** | 98 (81,7) | 94 (79,7) | 0,999 |
| **10-20 años** | 17 (14,2) | 18 (15,3) |
| **5-10 años** | 3 (2,5) | 4 (3,4) |
| **<5 años** | 2 (1,7) | 2 (1,7) |
| **Porcentaje de actividad pública, n (%)**  **100%** | 97 (80,8) | 99 (83,9) | 0,989 |
| **75-99%** | 12 (10) | 13 (11) |
| **50-74%** | 8 (6,7) | 4 (3,4) |
| **<50%** | 3 (2,5) | 2 (1,7) |
| **Pacientes HTA en consulta/ año, n (%)**  **Más de 100** | 88 (73,3) | 79 (66,9) | 0,350 |
| **75-100** | 32 (26,7) | 39 (33,1) |
| **Ámbito de trabajo, n (%)**  **Urbano** | 66 (55) | 68 (57,6) | 0,778 |
| **Semirural** | 29 (24,2) | 24 (20,3) |
| **Rural** | 25 (20,8) | 26 (22) |
| MAPs: médicos de Atención Primaria; D.E.: desviación estándar; HTA: Hipertensión arterial.  Valores continuos expresados como media ± D.E. y valores categóricos expresados como n (%). | | | |

**Tabla S2.** Recomendaciones generales no incluidas en el estudio Delphi.

|  | **Sentencias** |
| --- | --- |
| **Bloque 1: Antes de la consulta telemática** | **Contacto inicial con el paciente** |
| Hay que dar indicaciones generales previas al paciente para facilitar el mejor  desarrollo de la consulta (evitar ruido excesivo en el domicilio, lugar con  cobertura, disponer de lentes si las precisa, etc.). |
| **Preparación de la consulta telemática** |
| De forma previa a la consulta telemática, el MAP debe revisar la historia clínica  y obtener una visión general del paciente (aspectos clínicos y sociofamiliares  específicos, comorbilidades, tratamiento actual y pruebas complementarias  realizadas). |
| **Bloque 2: Durante la consulta telemática** | **Acciones a realizar al finalizar la consulta** |
| Hay que registrar en la historia clínica la información obtenida durante la  consulta telemática, de igual forma que una consulta presencial. |
| MAP: médico de Atención Primaria. | |

**Tabla S3.** Consistencia del cuestionario.

|  | **Ronda 1** | ***p*** | **Ronda 2** | ***p*** |
| --- | --- | --- | --- | --- |
| **α de C (p)** | ***ri (p)*** | **α de C (p)** | ***ri (p)*** |
| **Total**  **(59 ítems)** | 0,939 (*p*<0,001) | 0,906 (*p*<0,001) | 0,917 (*p*<0,001) | 0,851 (*p*<0,001) |
| **Bloque 1**  **(18 ítems)** | 0,834 (*p*<0,001) | 0,818 (*p*<0,001) | 0,846 (*p*<0,001) | 0,828 (*p*<0,001) |
| **Bloque 2**  **(32 ítems)** | 0,898 (*p*<0,001) | 0,816 (*p*<0,001) | 0,864 (*p*<0,001) | 0,765 (*p*<0,001) |
| **Bloque 3**  **(9 ítems)** | 0,855 (*p*<0,001) | 0,796 (*p*<0,001) | 0,854 (*p*<0,001) | 0,795 (*p*<0,001) |
| α de C: Alpha de Cronbach  *ri:* coeficiente de correlación intraclase | | | | |

**Tabla S4.** Correlación entre la primera y segunda ronda del cuestionario Delphi.

|  | ***rs*** | ***p*** | ***k*** | ***p*** |
| --- | --- | --- | --- | --- |
| **Total**  **(59 ítems)** | 0,942 | <0,001 | 0,843 | <0,001 |
| **Bloque 1**  **(18 ítems)** | 0,915 | <0,001 | 0,802 | <0,001 |
| **Bloque 2**  **(32 ítems)** | 0,916 | <0,001 | 0,812 | <0,001 |
| **Bloque 3**  **(9 ítems)** | 0,897 | <0,001 | 0,742 | <0,001 |
| *rs*: coeficiente de correlación de Spearman; *k*: índice de Kappa. | | | | |
